# Supplementary material
Source: PubMed Central journal article supplement (PMC3989652)
Supplement: embj0033-0578-sd2.pdf [file embj0033-0578-sd2.pdf]

**B**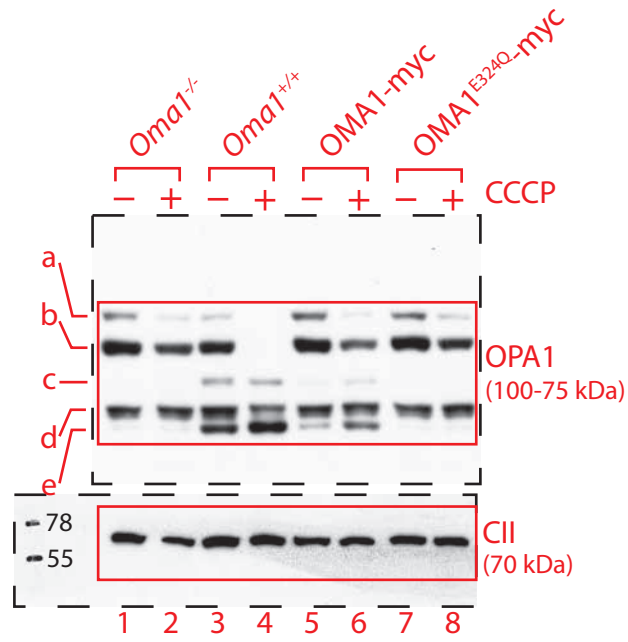**C**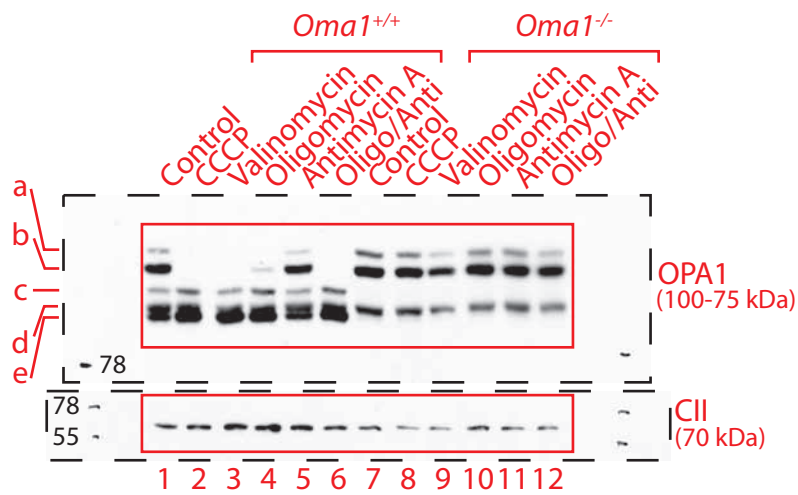**E**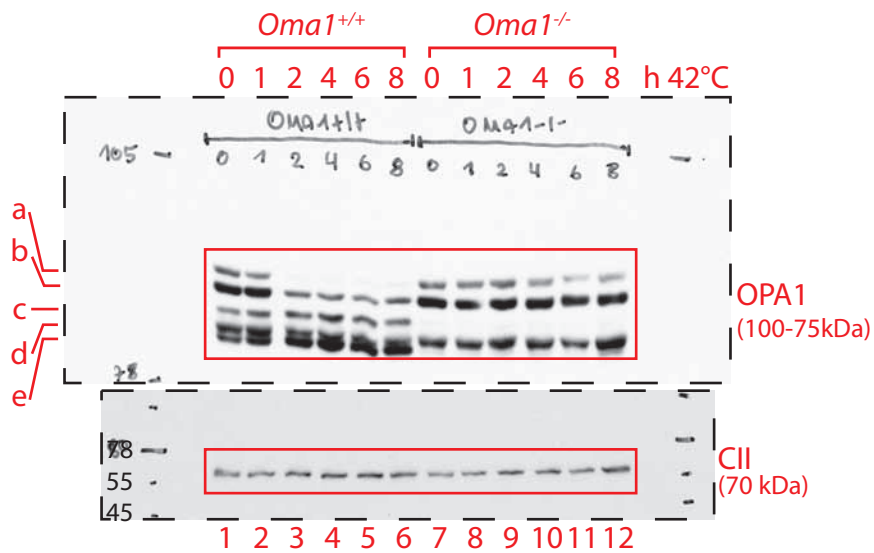

Figure 1

**F**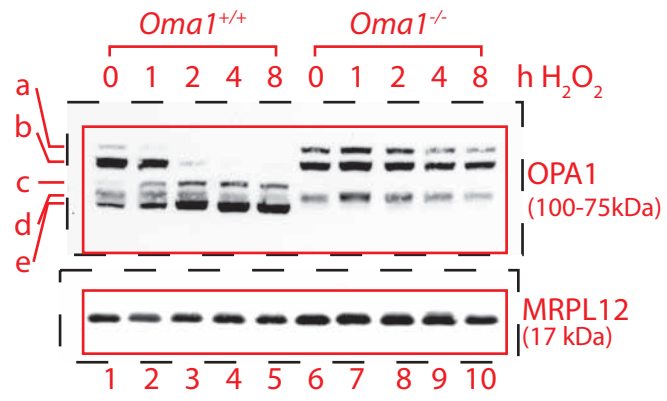**G**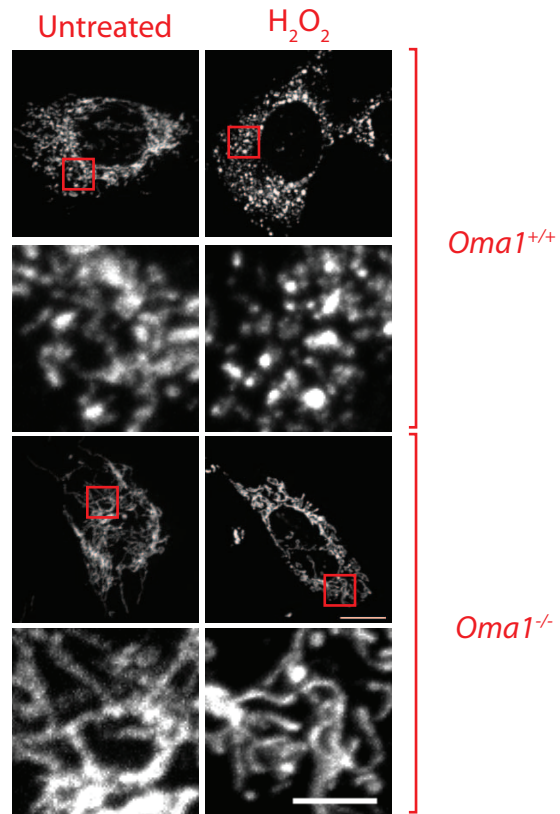

Figure 1
