# Supplementary material
Source: PubMed Central journal article supplement (PMC3989652)
Supplement: embj0033-0578-sd4.pdf [file embj0033-0578-sd4.pdf]

**A**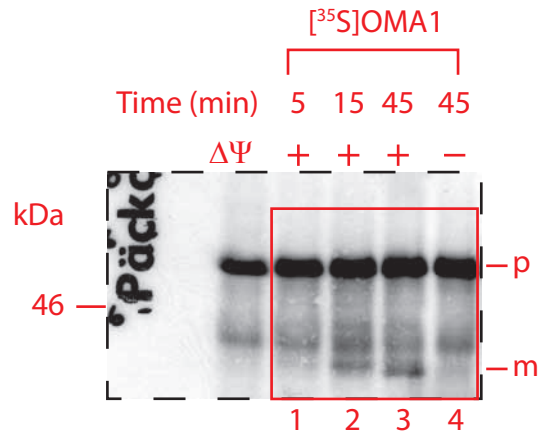**B**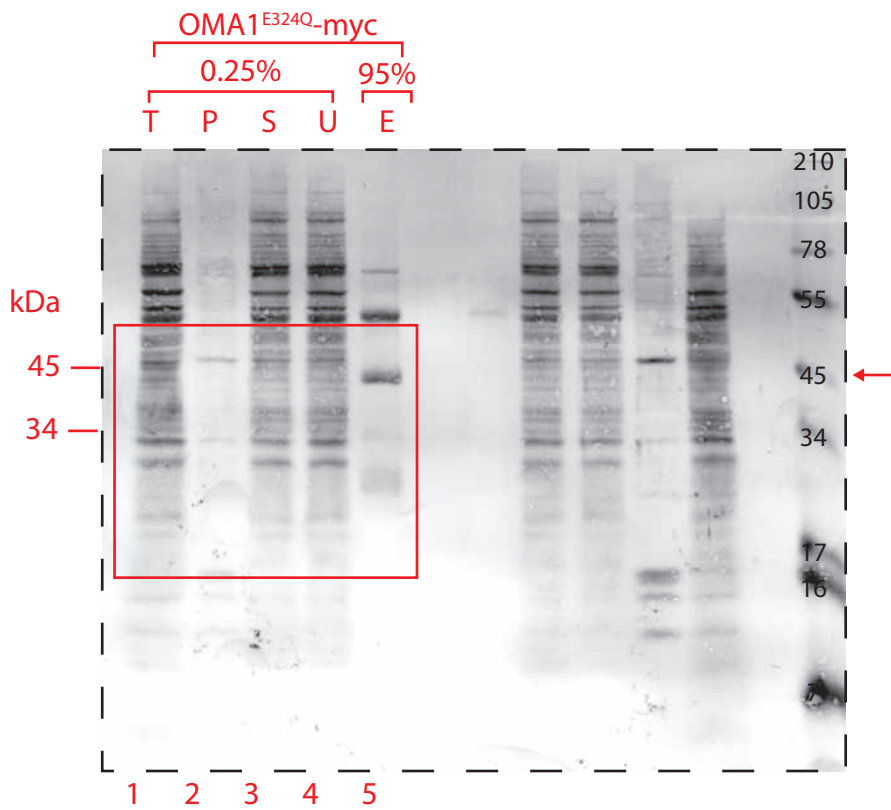**D**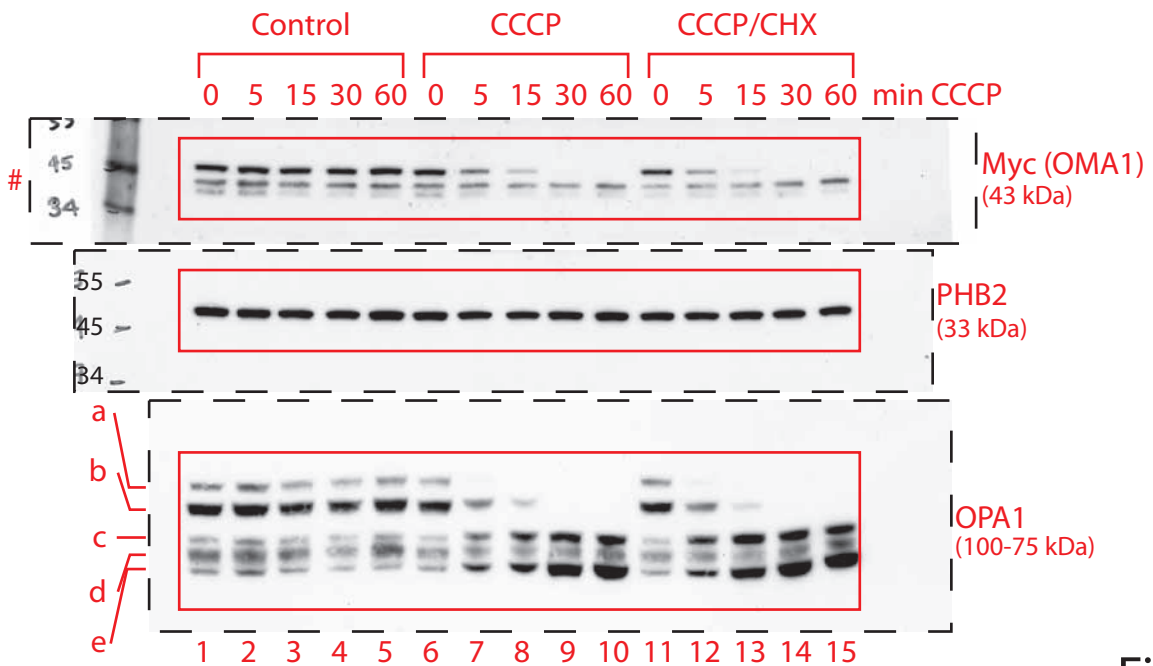

Figure 3

**E**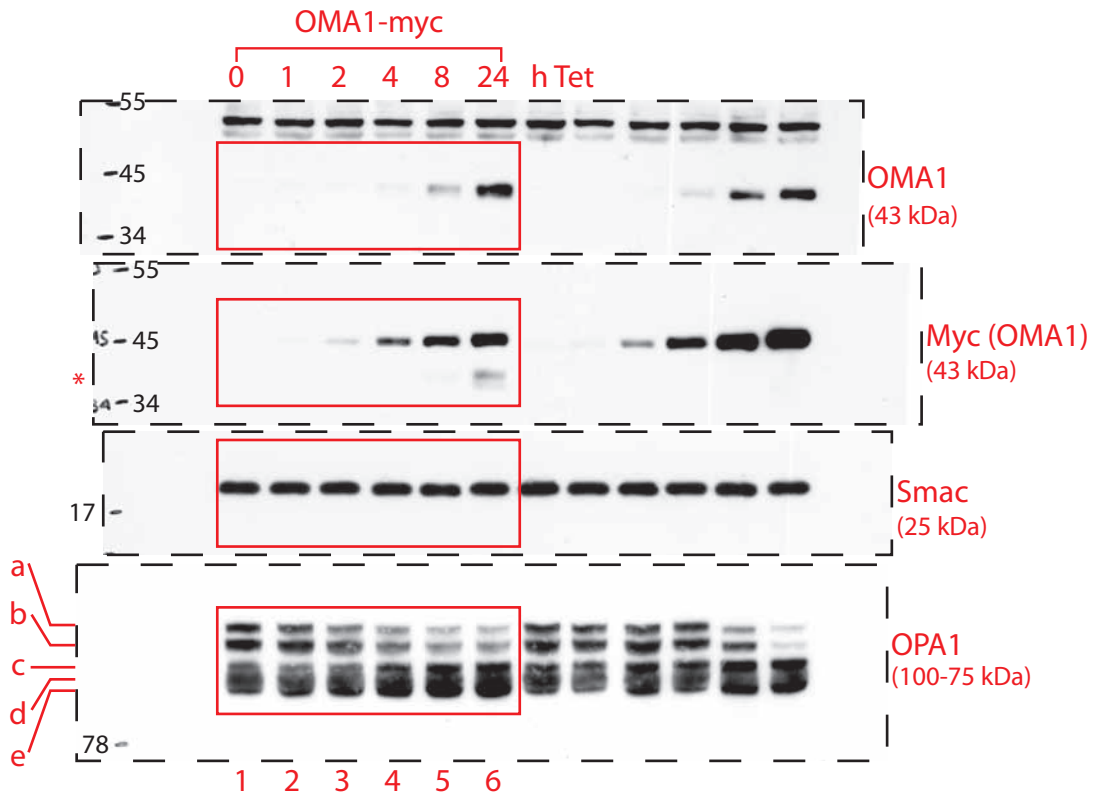**F**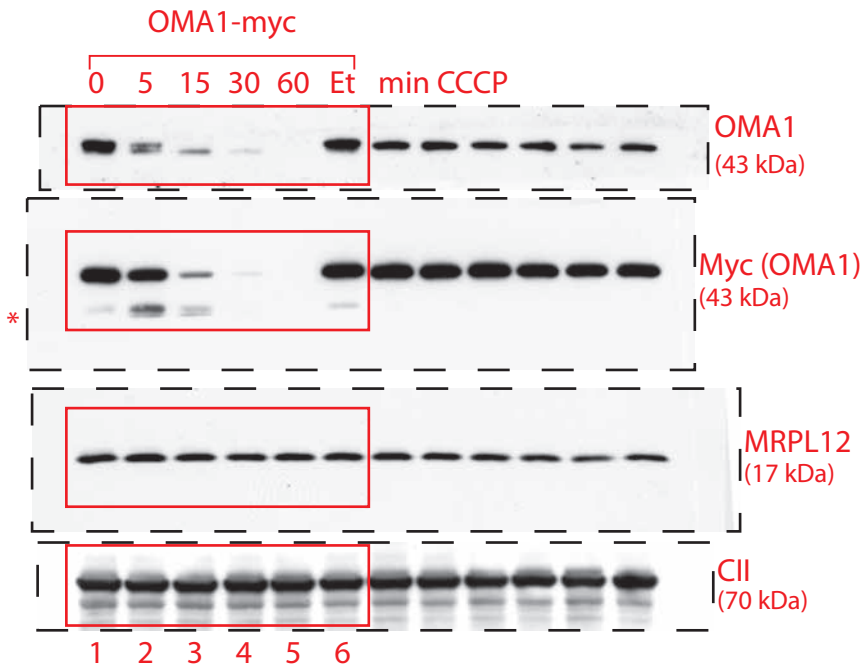

Figure 3
