# Supplementary material
Source: PubMed Central journal article supplement (PMC3989652)
Supplement: embj0033-0578-sd5.pdf [file embj0033-0578-sd5.pdf]

**A**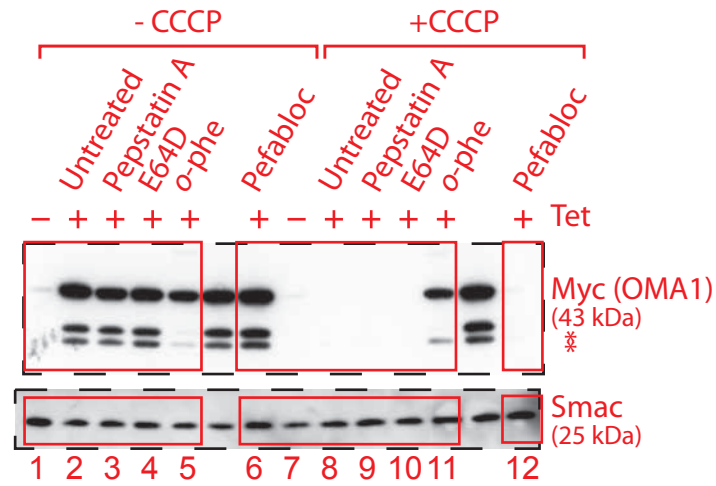**B**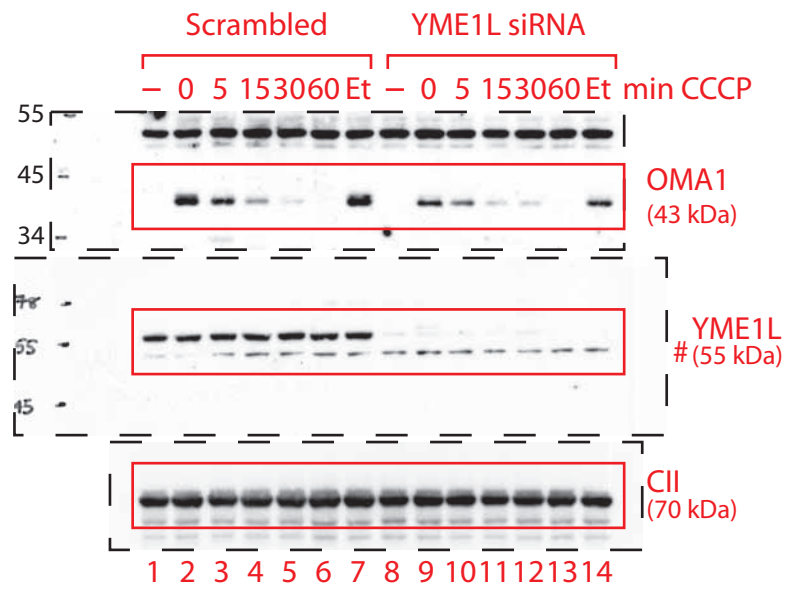**C**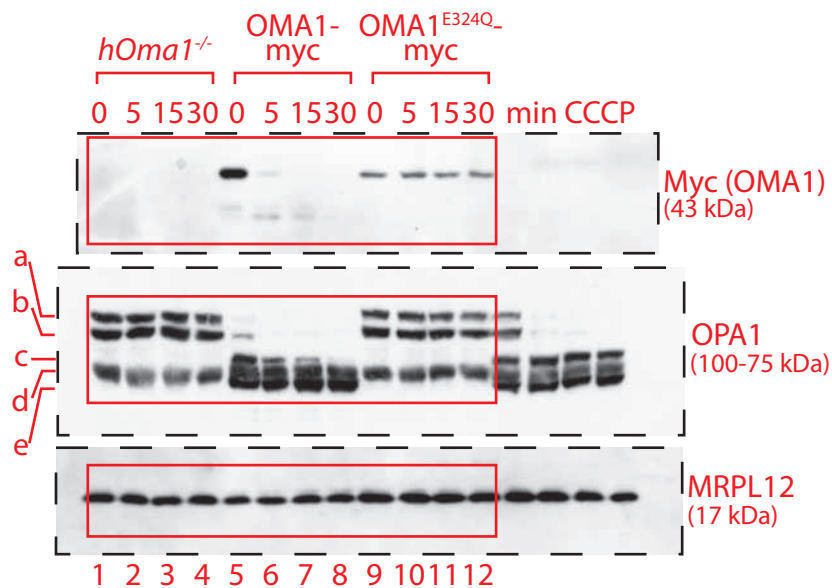

Figure 4
