# Supplementary material
Source: PubMed Central journal article supplement (PMC3989652)
Supplement: embj0033-0578-sd6.pdf [file embj0033-0578-sd6.pdf]

**A**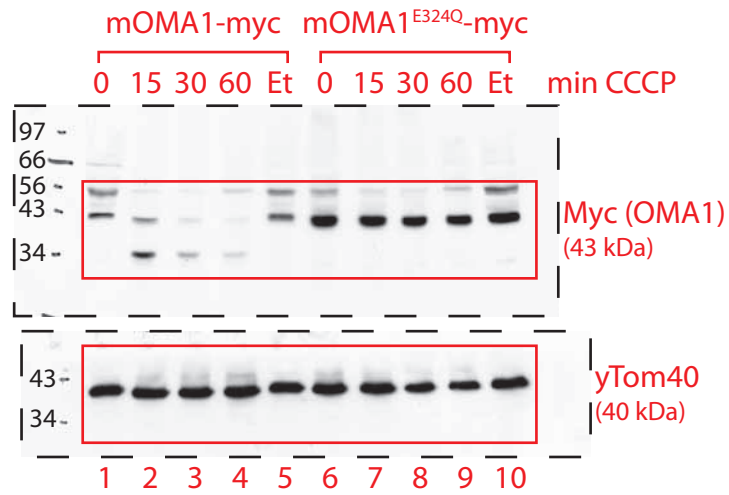**B**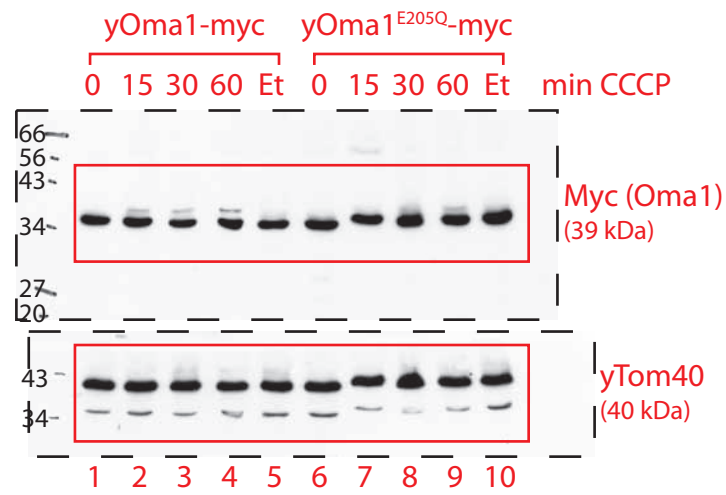**D**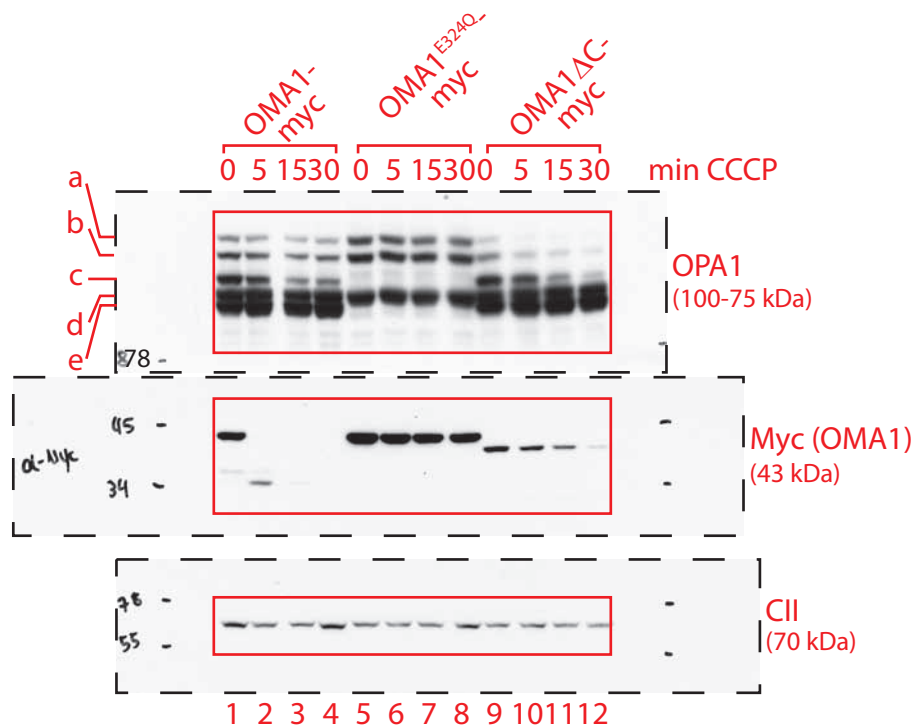

Figure 5

**E**

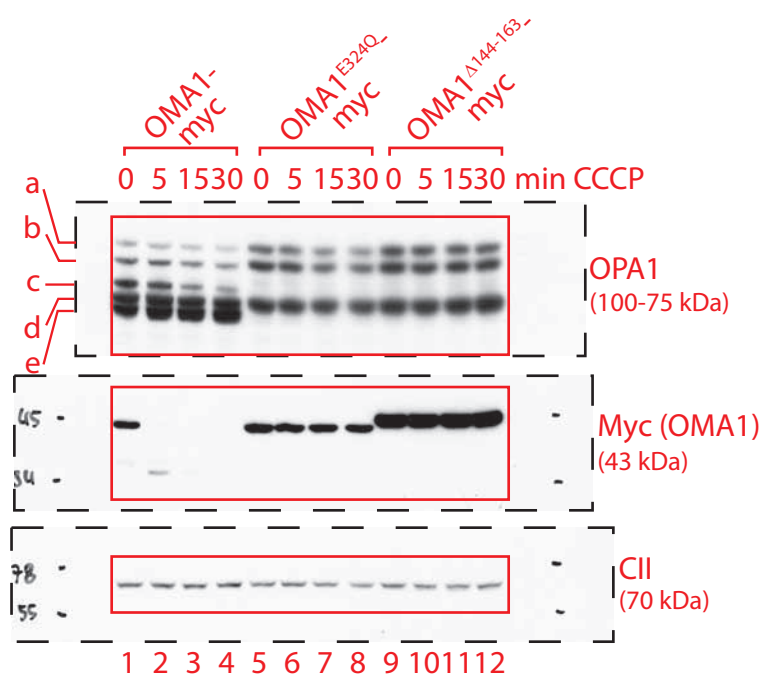

Figure 5
