# Supplementary material
Source: PubMed Central journal article supplement (PMC3989652)
Supplement: embj0033-0578-sd7.pdf [file embj0033-0578-sd7.pdf]

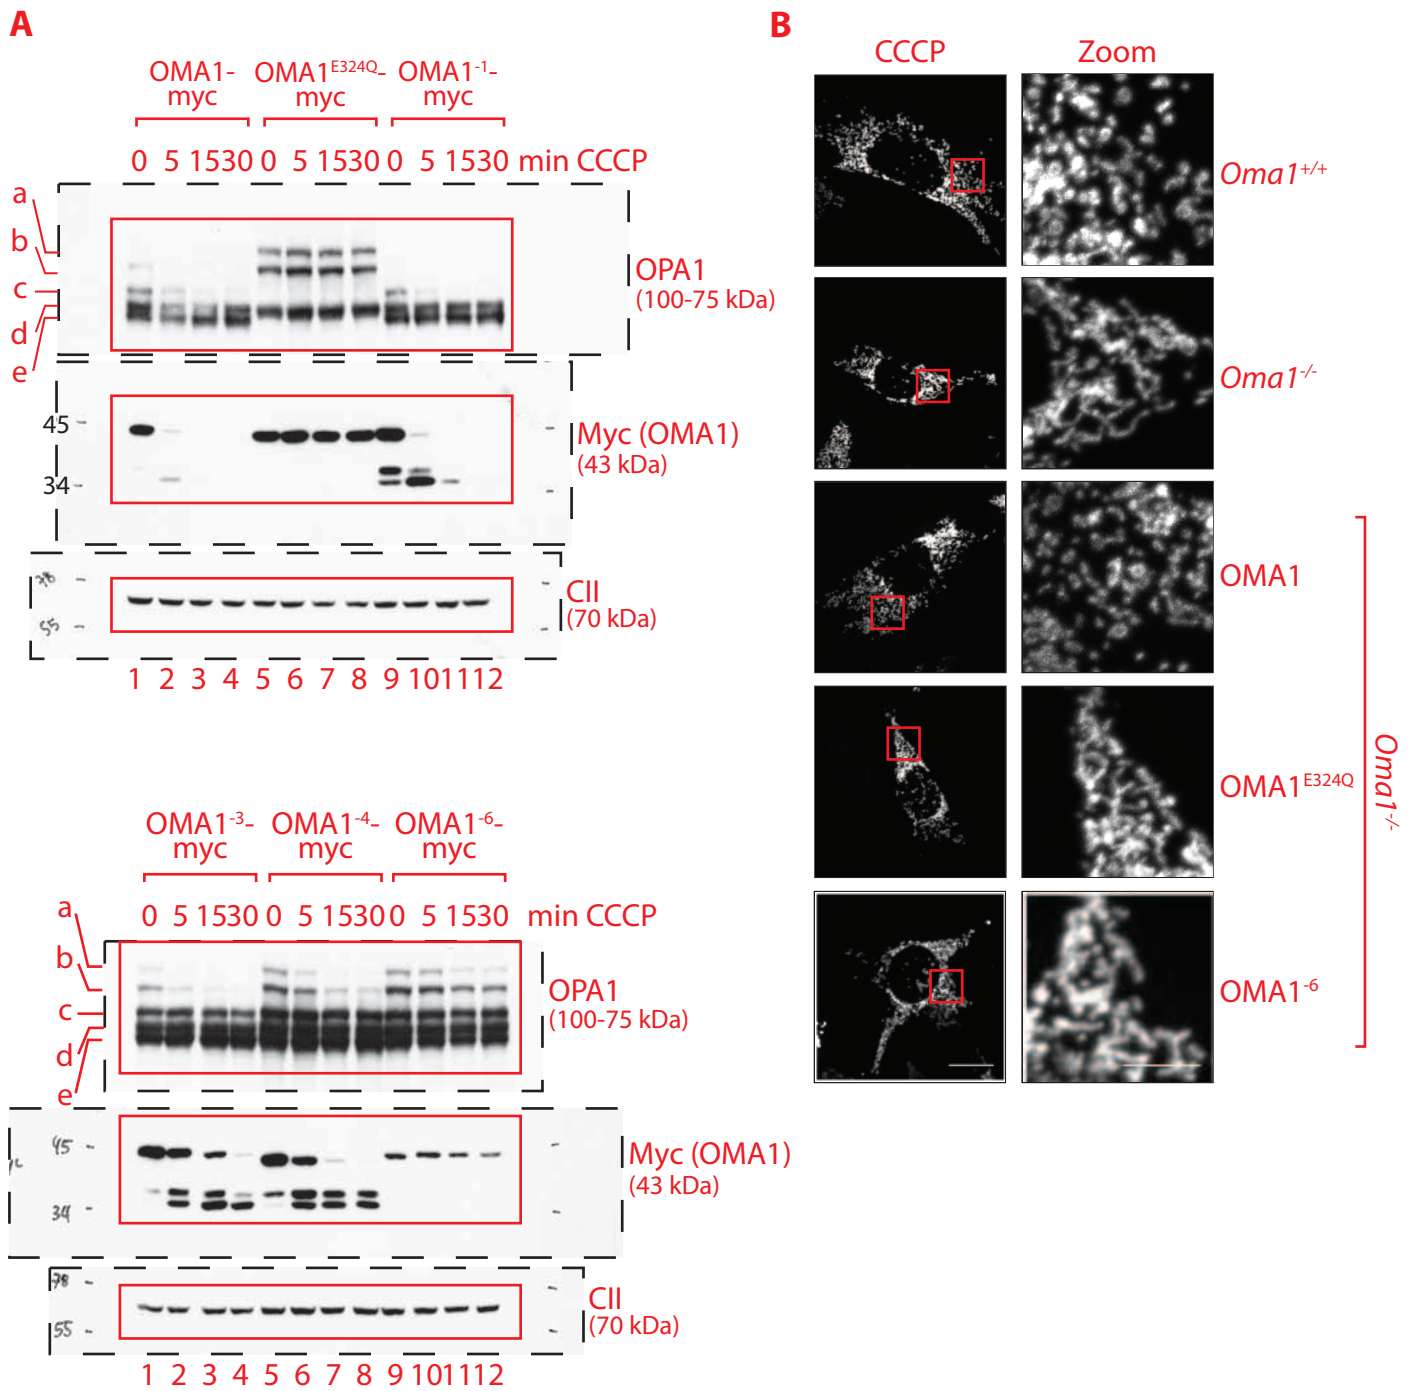

Figure 6
