# Supplementary material
Source: PubMed Central journal article supplement (PMC3989652)
Supplement: embj0033-0578-sd8.pdf [file embj0033-0578-sd8.pdf]

**A**

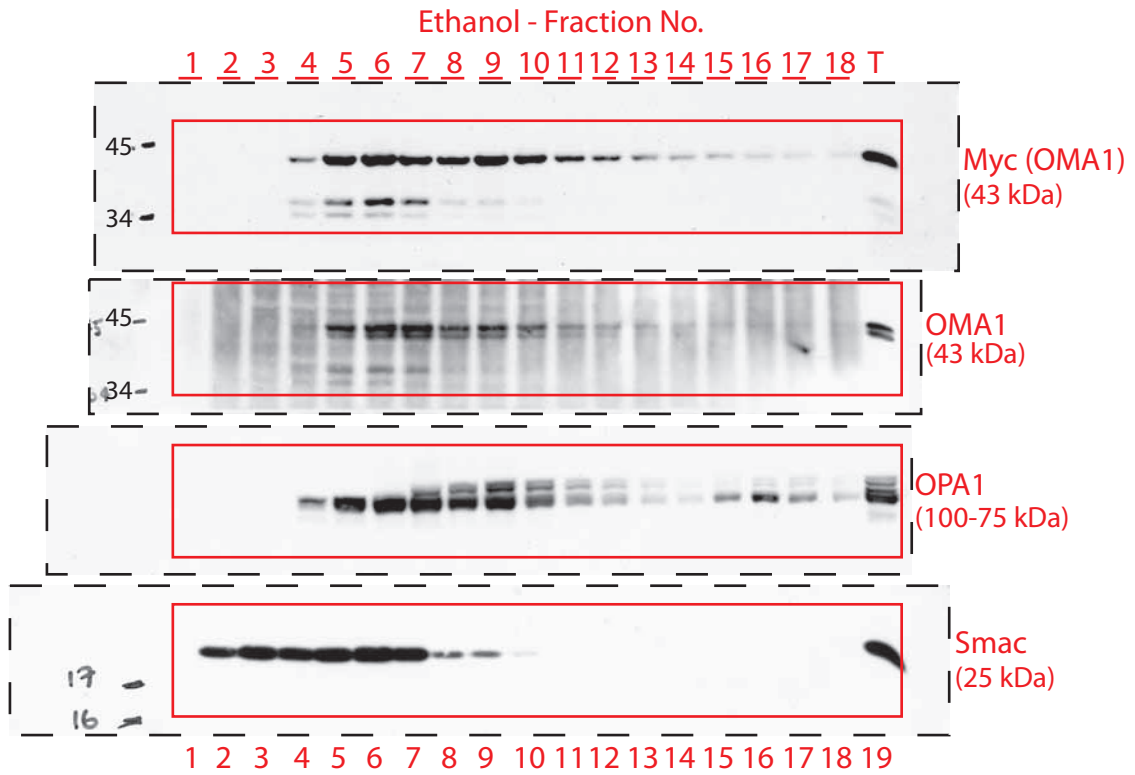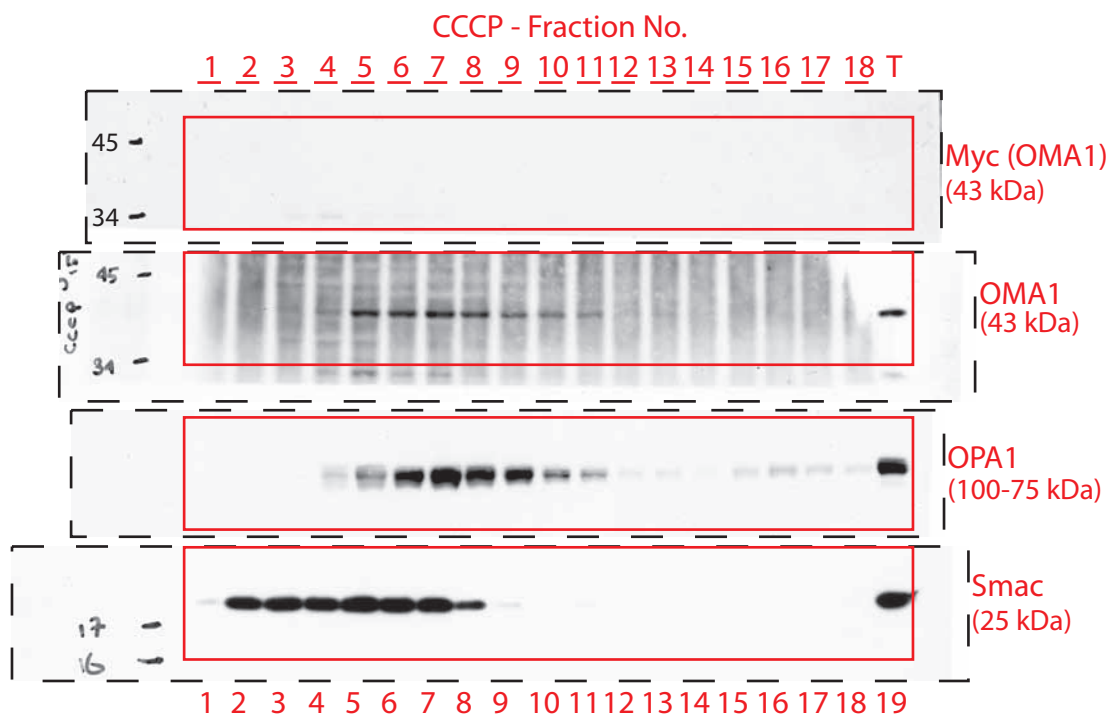

Figure 7

**B**

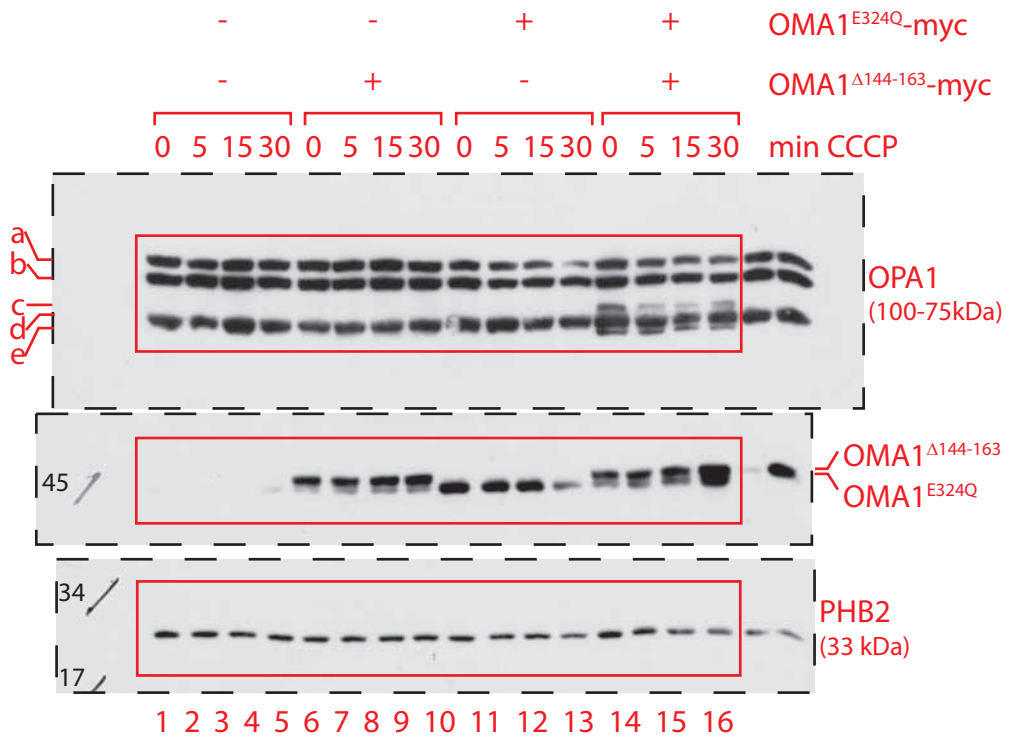

Figure 7
