# Supplementary material
Source: PubMed Central journal article supplement (PMC3989652)
Supplement: embj0033-0578-sd9.pdf [file embj0033-0578-sd9.pdf]

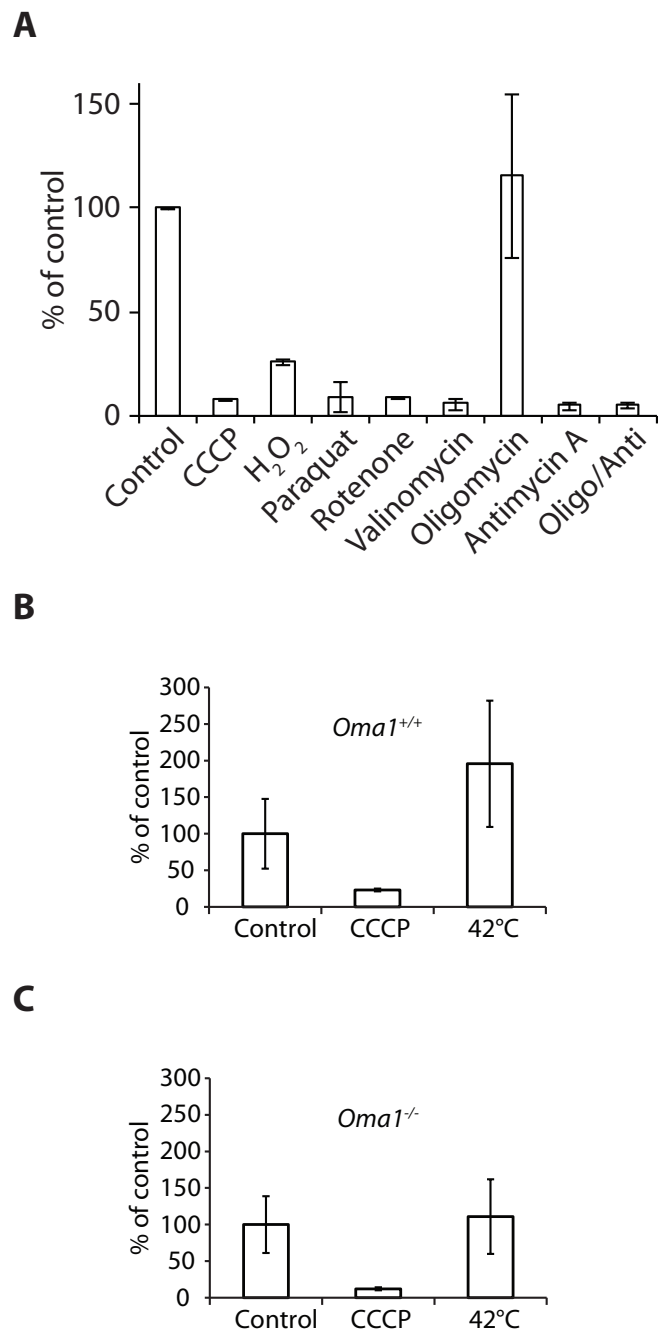

**Figure S1. Determination of  $\Delta\Psi$  in MEFs following stress treatments.**

**(A)** *Oma1<sup>-/-</sup>* MEFs were treated with CCCP (20  $\mu$ M, 30 min), H<sub>2</sub>O<sub>2</sub> (0.5 mM, 8 h), paraquat (5 mM, 8 h), valinomycin (1  $\mu$ M, 1 h), oligomycin (1  $\mu$ M, 1 h) or antimycin A (1  $\mu$ M, 1 h) as indicated and membrane potential was measured by JC-1 staining. Untreated MEFs were used as control. **(B, C)** Heat stress does not decrease mitochondrial membrane potential. *Oma1<sup>+/+</sup>* and *Oma1<sup>-/-</sup>* MEFs were cultured for 4 h at 37 or 42°C and the membrane potential measured using TMRM staining (10 nM). >80 cells were analysed by immunofluorescence. Cells incubated with TMRM and CCCP (20  $\mu$ M) served as control.
