# Supplementary material
Source: PubMed Central journal article supplement (PMC3989652)
Supplement: embj0033-0578-sd10.pdf [file embj0033-0578-sd10.pdf]

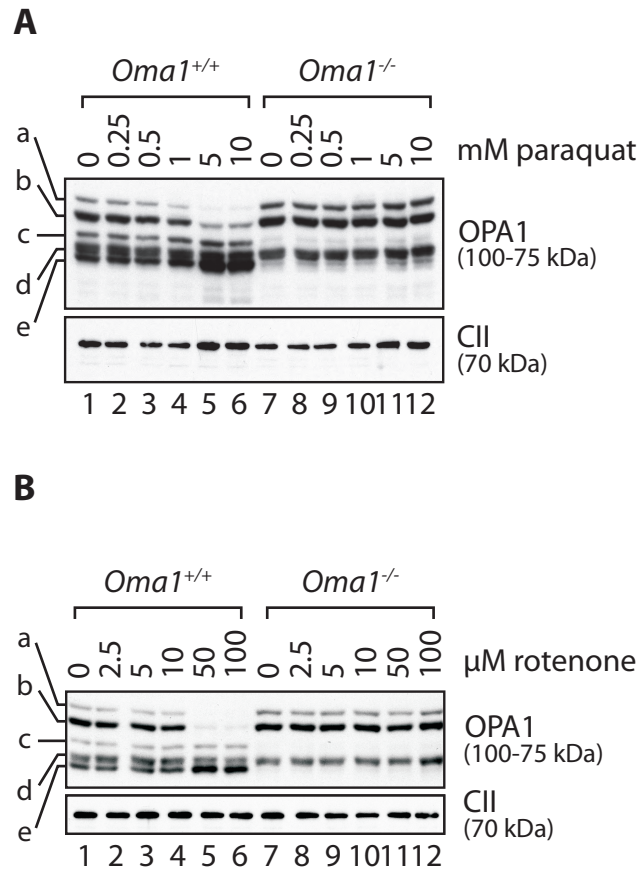

**Figure S2. Oxidative stress induces OMA1-mediated OPA1 processing.**

*Oma1*<sup>+/+</sup> and *Oma1*<sup>-/-</sup> MEFs were incubated with (A) paraquat for 8 h or (B) rotenone for 10 h at the concentrations indicated. Cellular proteins were extracted and analysed by immunoblotting with the indicated antibodies.
