# Supplementary material
Source: PubMed Central journal article supplement (PMC3989652)
Supplement: embj0033-0578-sd11.pdf [file embj0033-0578-sd11.pdf]

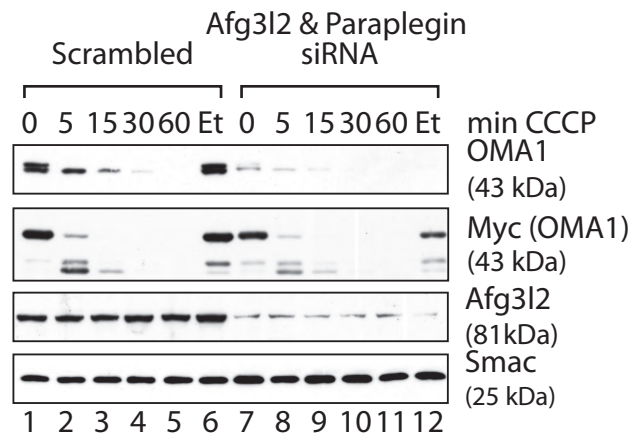

**Figure S3. The *m*-AAA protease does not degrade OMA1 in depolarized mitochondria.** HEK293 cells were transfected with siRNA directed against Afg3l2 and Spg7 (encoding paraplegin) or scrambled siRNA for control. After induction of OMA1-myc expression by adding tetracycline, cells were incubated with CCCP or, for control, ethanol (Et) for the time points indicated. Samples were analysed by SDS-PAGE and immunoblotting.
