# Supplementary material
Source: PubMed Central journal article supplement (PMC3989652)
Supplement: embj0033-0578-sd12.pdf [file embj0033-0578-sd12.pdf]

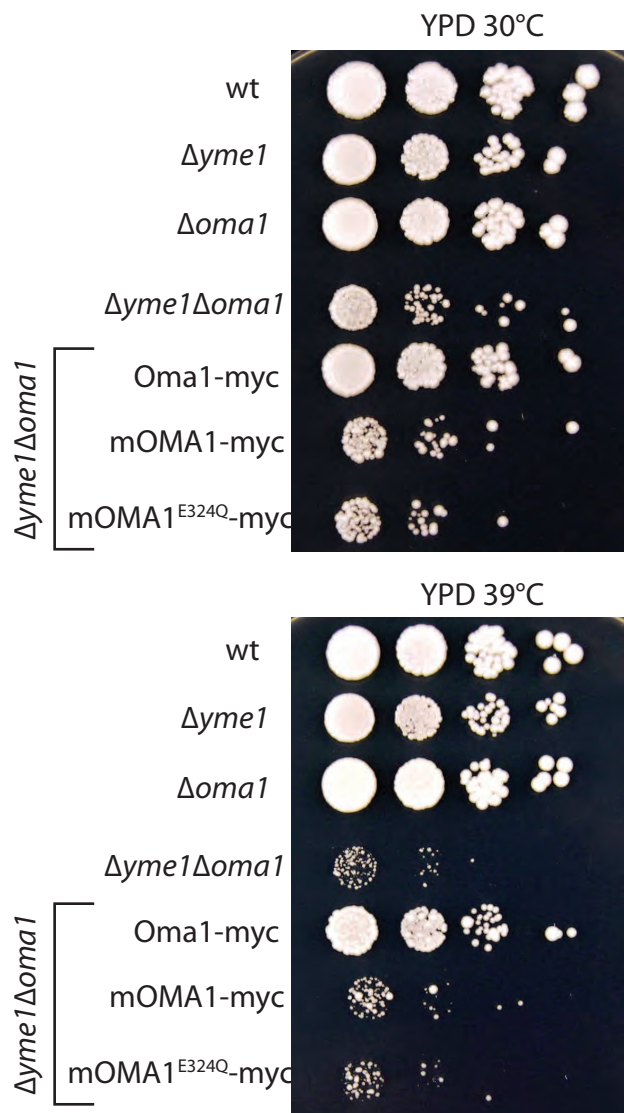

**Figure S4. Expression of mouse OMA1 does not suppress growth defects associated with the loss of Oma1 in  $\Delta yme1$  yeast cells.** Wildtype (wt),  $\Delta yme1$ ,  $\Delta oma1$  and  $\Delta oma1\Delta yme1$  yeast cells were grown on synthetic media containing glucose as the sole carbon source. Plasmids expressing yeast Oma1, mouse OMA1 or mouse OMA1<sup>E324Q</sup> were transformed into  $\Delta oma1\Delta yme1$  cells. Serial dilutions of the cells were spotted on synthetic media containing glucose and incubated at various temperatures as indicated.
