# Supplementary material
Source: PubMed Central journal article supplement (PMC3989652)
Supplement: embj0033-0578-sd13.pdf [file embj0033-0578-sd13.pdf]

**A**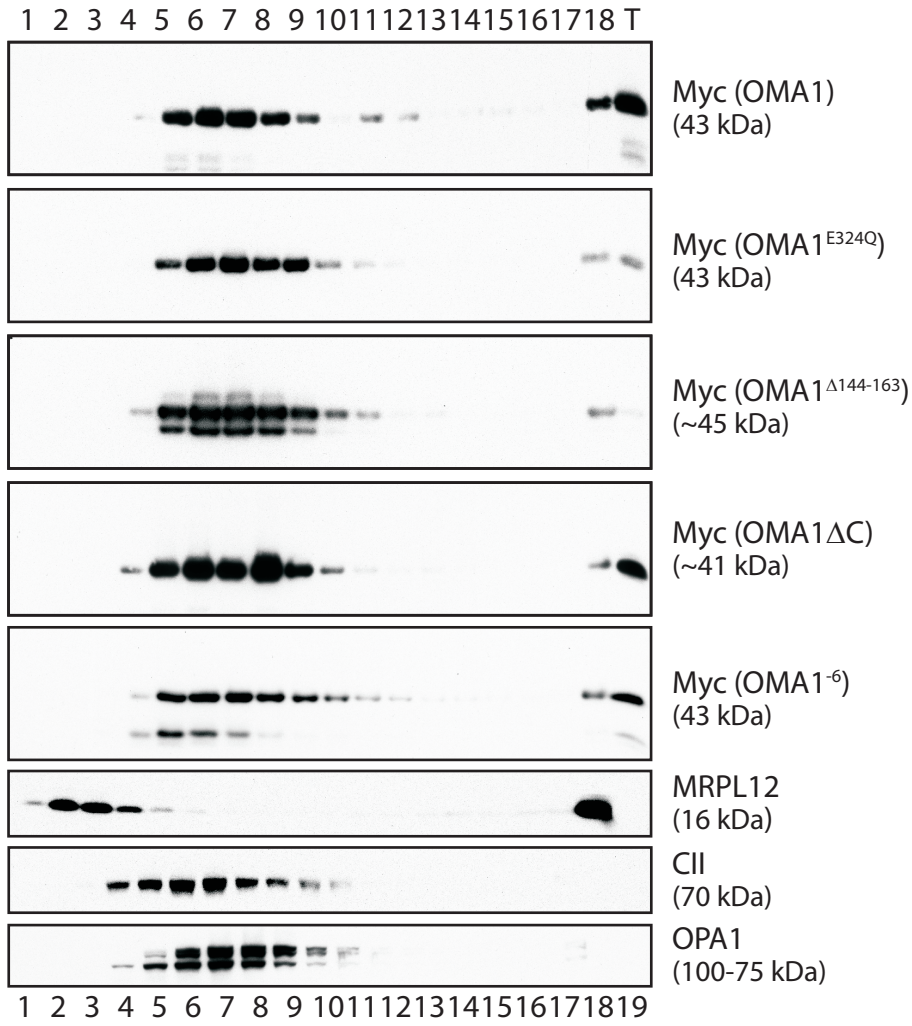**B**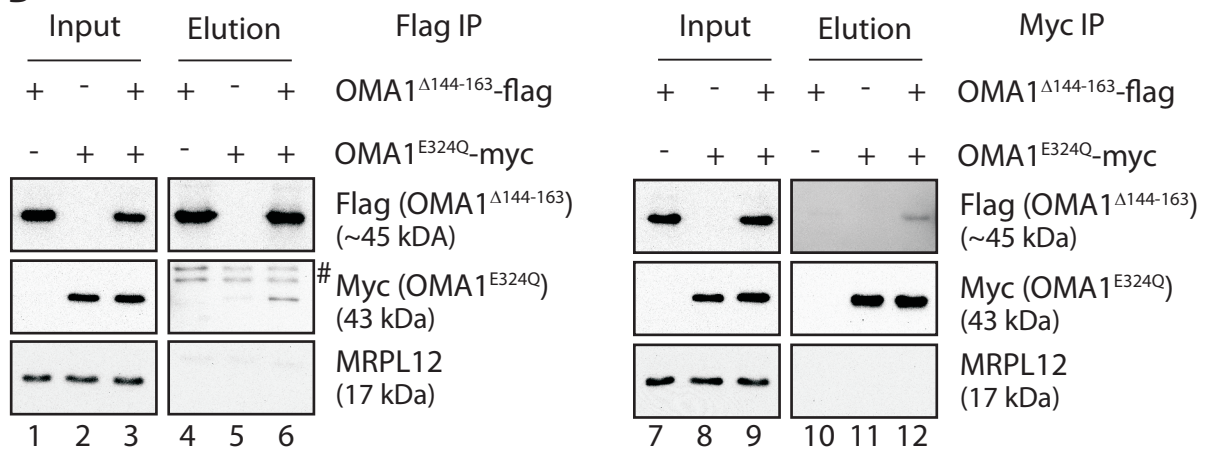

Figure S5

**Figure S5. OMA1 mutants form higher molecular weight complexes. (A)** Mitochondria were isolated from *hOma1*<sup>-/-</sup> cells expressing OMA1-myc, OMA1<sup>E324Q</sup>-myc, OMA1<sup>Δ144-163</sup>-myc, OMA1ΔC-myc and OMA1<sup>-6</sup>-myc. Mitochondria were solubilized and subjected to density gradient centrifugation. Fractions were collected, TCA precipitated and subjected to SDS-PAGE and immunoblotting. **(B)** Assembly of proteolytically inactive OMA1<sup>E324Q</sup>-myc and OMA1<sup>Δ144-163</sup>-flag. *hOma1*<sup>-/-</sup> cells expressing OMA1<sup>E324Q</sup>-myc were either transfected with empty vector control or OMA1<sup>Δ144-163</sup>-flag as indicated. Mitochondria were isolated, solubilized with digitonin and, after a clarifying spin, extracts were subjected to immunoprecipitation using flag- or myc-specific antibodies. Samples were analysed by SDS-PAGE and immunoblotting.
