# Supplementary material
Source: PubMed Central journal article supplement (PMC3989652)
Supplement: embj0033-0578-sd14.pdf [file embj0033-0578-sd14.pdf]

**A**

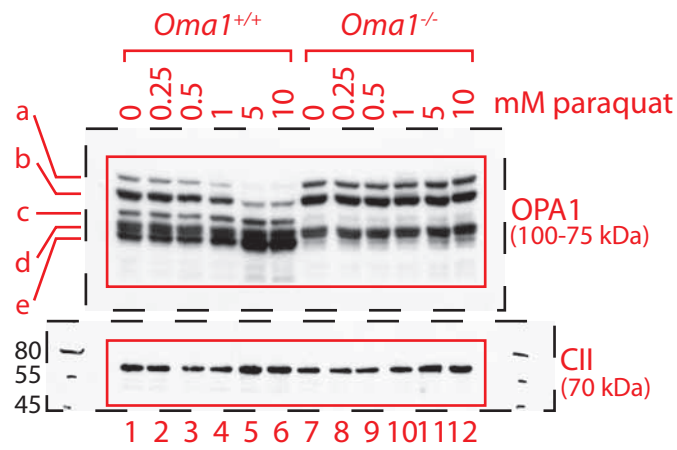

**B**

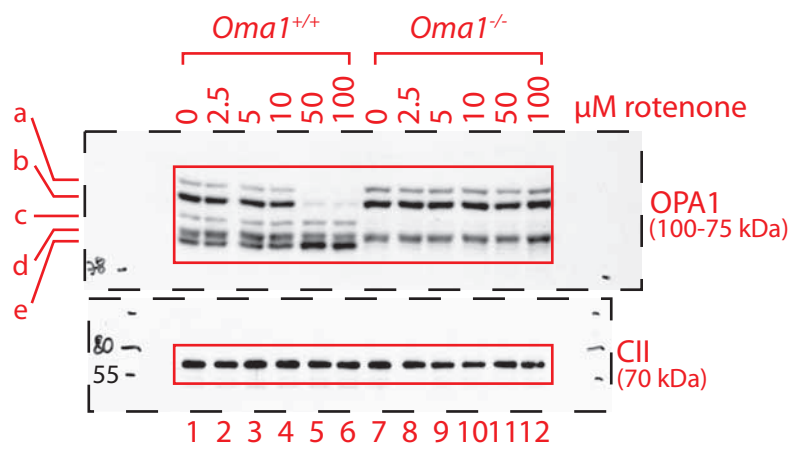

Figure S2
