# Supplementary material
Source: PubMed Central journal article supplement (PMC3989652)
Supplement: embj0033-0578-sd16.pdf [file embj0033-0578-sd16.pdf]

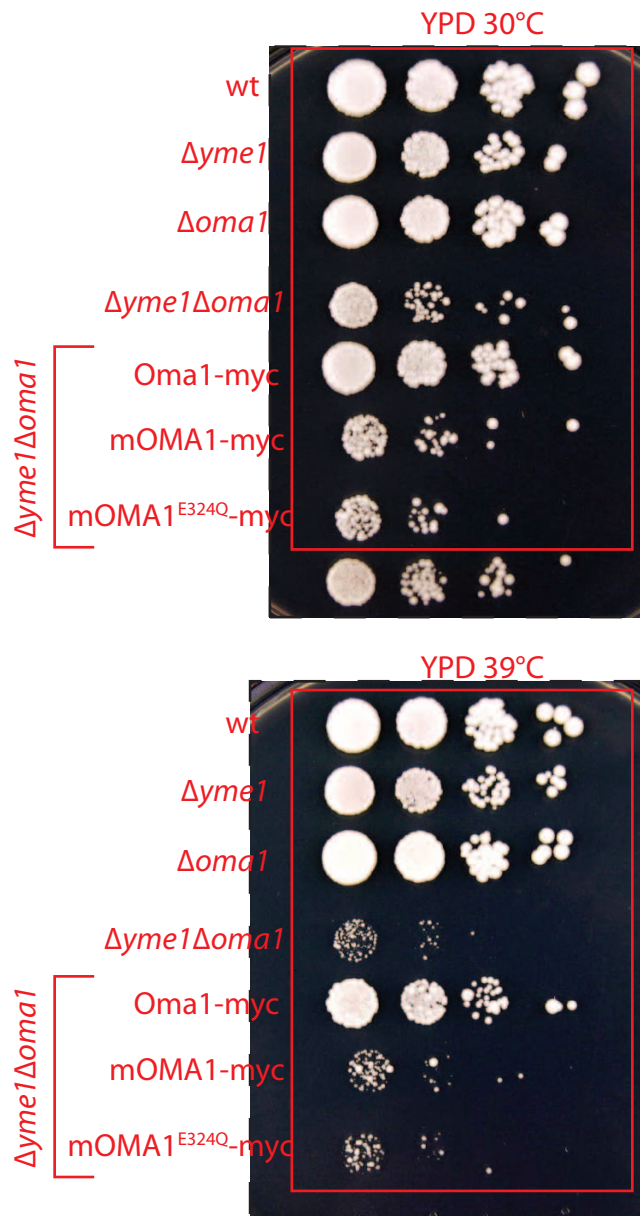

Figure S4
