# Supplementary material
Source: PubMed Central journal article supplement (PMC3989652)
Supplement: embj0033-0578-sd17.pdf [file embj0033-0578-sd17.pdf]

**A**

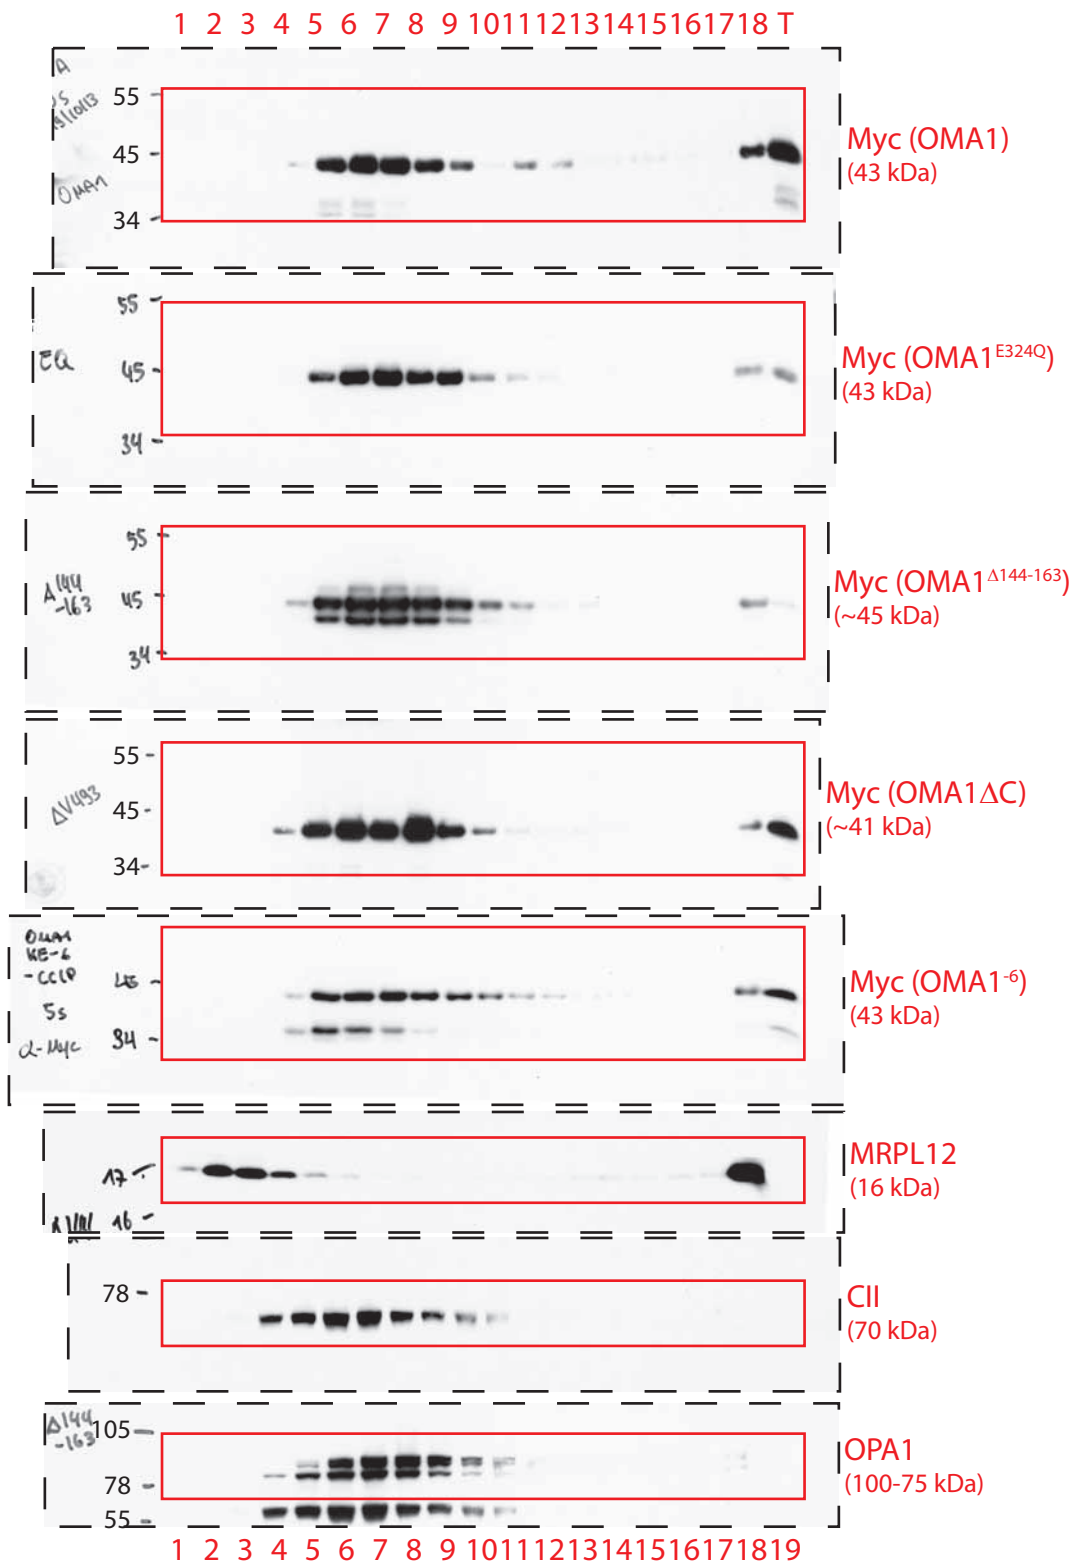

Figure S5

**B**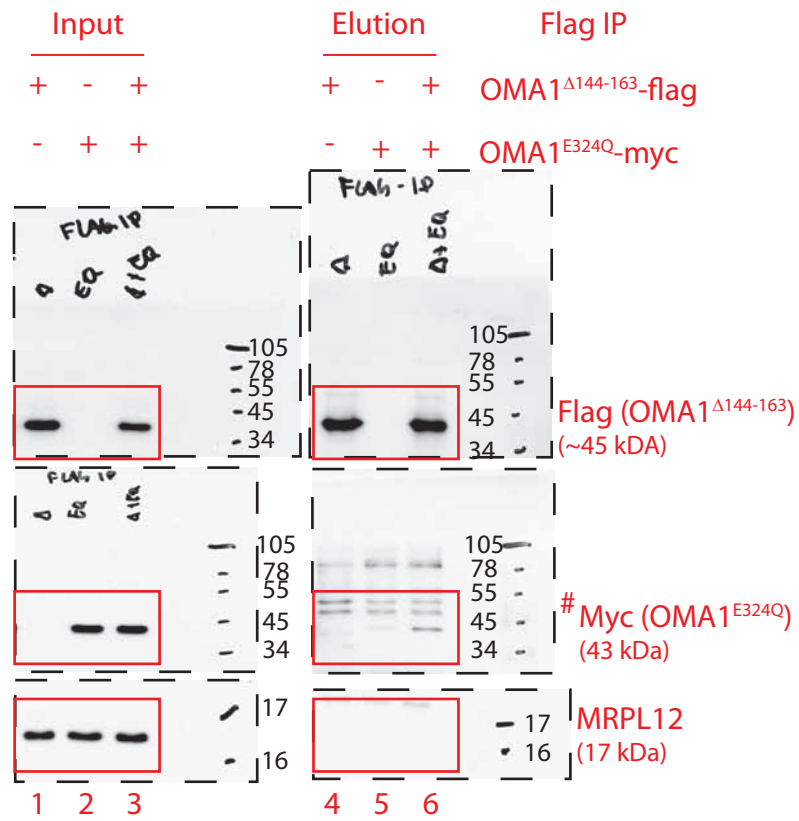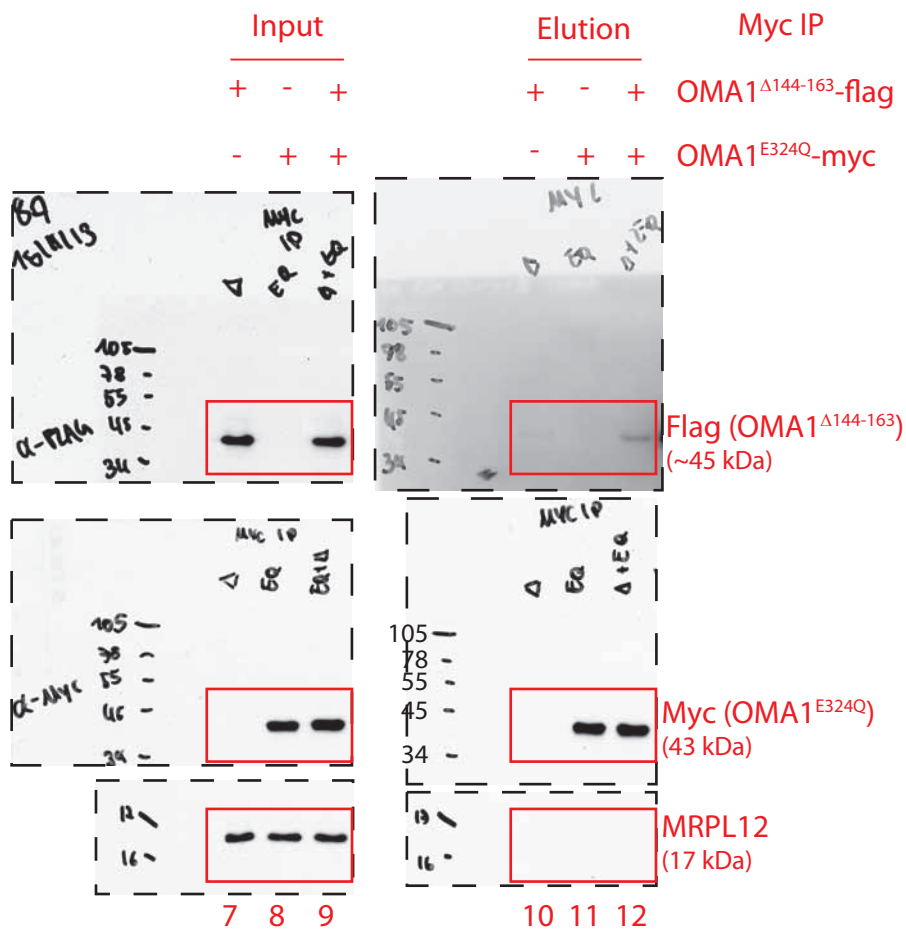

Figure S5
